# Supplementary material for: Dry Reforming of Methane over Pyrochlore-Type La2Ce2O7-Supported Ni Catalyst: Effect of Particle Size of Support
Source: MDPI journal article supplement (doi:10.3390/molecules29081871), 2024-04-19
Supplement: s1 [file s1]

## Supporting information

### Dry reforming of methane over pyrochlore-type $\text{La}_2\text{Ce}_2\text{O}_7$ supported Ni catalyst: effect of particle size of support

Zeling Zhou<sup>a,b,&</sup>, Chao Li<sup>a,b,&</sup>, Junfeng Zhang<sup>a,\*</sup>, Qiliang Gao<sup>a,b</sup>, Jiahao Wang<sup>a,b</sup>, Qingde Zhang<sup>a</sup>, Yizhuo Han<sup>a,\*</sup>

<sup>a</sup> State Key Laboratory of Coal Conversion, Institute of Coal Chemistry, Chinese Academy of Sciences, Taiyuan, 030001, China

<sup>b</sup> University of Chinese Academy of Sciences, Beijing, 100049, China

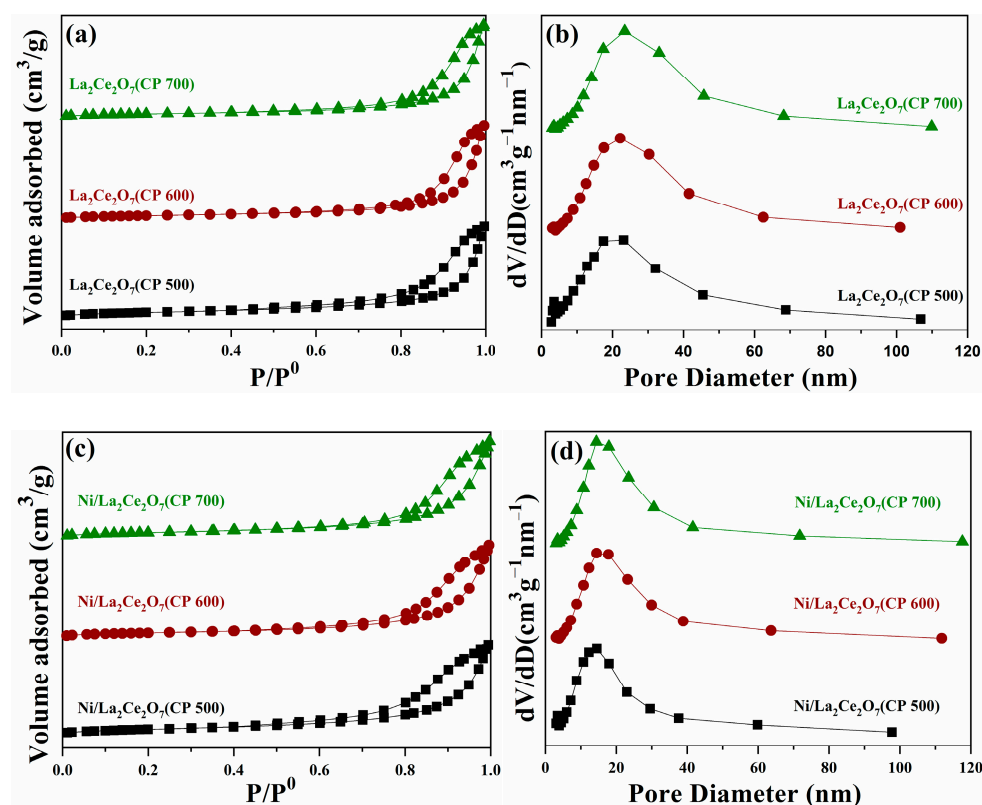

**Figure S1** N<sub>2</sub> isotherms and pore distribution of the prepared supports (a and b) and Ni-loaded catalysts (c and d).

\*: Corresponding authors. &: These authors contributed equally to this work

Institute of Coal Chemistry, Chinese Academy of Sciences, Taiyuan, 030001, China. Tel:

+86-351-4049747, E-mail: [hanyz@sxicc.ac.cn](mailto:hanyz@sxicc.ac.cn) (Y.Z. Han); [zhangjf@sxicc.ac.cn](mailto:zhangjf@sxicc.ac.cn) (J.F. Zhang )

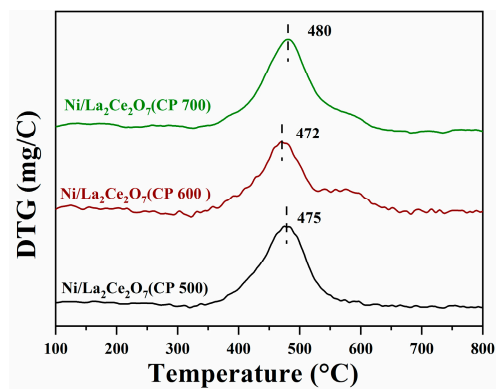

**Figure S2** DTA profiles of spent  $\text{Ni/La}_2\text{Ce}_2\text{O}_7(\text{CP T})$  catalysts
